# Supplementary material for: The EPH/Ephrin System in Gynecological Cancers: Focusing on the Roots of Carcinogenesis for Better Patient Management
Source: MDPI journal article supplement (doi:10.3390/ijms23063249), 2022-03-17
Supplement: s1 [file s1]

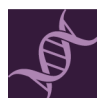

Review

# The EPH/ephrin system in Gynecological Cancers: Focusing on the roots of carcinogenesis for better patients' management

Iason Psilopatis<sup>1,2</sup>, Alexandros Pergaris<sup>1</sup>, Kleio Vrettou<sup>1</sup>, Gerasimos Tsourouflis<sup>1</sup>, Stamatios Theocharis<sup>1\*</sup>

**Supplementary Table S1:** Nature of the cells of each cell line according to the Cellosaurus database [1].

| Cell line                                            | GC type                                                          |
|------------------------------------------------------|------------------------------------------------------------------|
| <b>Ovaries</b>                                       |                                                                  |
| SKOV3/SKOV3ip1                                       | Ovarian serous cystadenocarcinoma                                |
| COV504                                               | Ovarian carcinoma                                                |
| A2780/A2780-PAR/A2780Cp20/A2780wtTP53/<br>A2780mTP53 | Ovarian endometrioid adenocarcinoma                              |
| OVK-18                                               | Ovarian endometrioid adenocarcinoma                              |
| HIO-180                                              | Ovary; surface epithelium                                        |
| EG                                                   | Ovarian endometrioid adenocarcinoma                              |
| 222                                                  | Ovarian mixed germ cell tumor                                    |
| ES 2                                                 | Ovarian clear cell adenocarcinoma                                |
| OVCAR3                                               | High-grade ovarian serous adenocarcinoma                         |
| OVCAR4                                               | High-grade ovarian serous adenocarcinoma                         |
| OVCAR8                                               | High-grade ovarian serous adenocarcinoma                         |
| OV 90                                                | High-grade ovarian serous adenocarcinoma                         |
| ML5                                                  | Ovarian serous cystadenoma                                       |
| ML10                                                 | Ovarian papillary cystadenoma                                    |
| MCV 50                                               | Ovarian papillary cystadenoma                                    |
| HOC-7                                                | Ovarian serous adenocarcinoma                                    |
| HeyA8                                                | High-grade ovarian serous adenocarcinoma                         |
| <b>Endometrium</b>                                   |                                                                  |
| AN3CA                                                | Endometrial adenocarcinoma                                       |
| ECC-1                                                | Endometrial adenocarcinoma                                       |
| Ishikawa                                             | Endometrial adenocarcinoma                                       |
| HEC1A                                                | Endometrial adenocarcinoma                                       |
| HEC1B                                                | Endometrial adenocarcinoma                                       |
| KLE                                                  | Endometrial adenocarcinoma                                       |
| <b>Cervix</b>                                        |                                                                  |
| HO8910                                               | Human papillomavirus-related endocervical<br>adenocarcinoma      |
| SiHa                                                 | Human papillomavirus-related cervical<br>squamous cell carcinoma |

---

|      |                                                               |
|------|---------------------------------------------------------------|
| HeLa | Human papillomavirus-related endocervical adenocarcinoma      |
| C4-i | Human papillomavirus-related cervical squamous cell carcinoma |
| C33A | Cervical squamous cell carcinoma                              |

## References

1. Expasy-Cellosaurus. Available online: <https://web.expasy.org/cellosaurus/> (accessed on 11 March 2022)
